# Supplementary material
Source: MDPI journal article supplement (https://www.mdpi.com/1424-8247/15/9/1040)
Supplement: s1 [file s1]

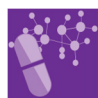

## Supplementary Materials

### A peptide inhibitor of the human cytomegalovirus core nuclear egress complex

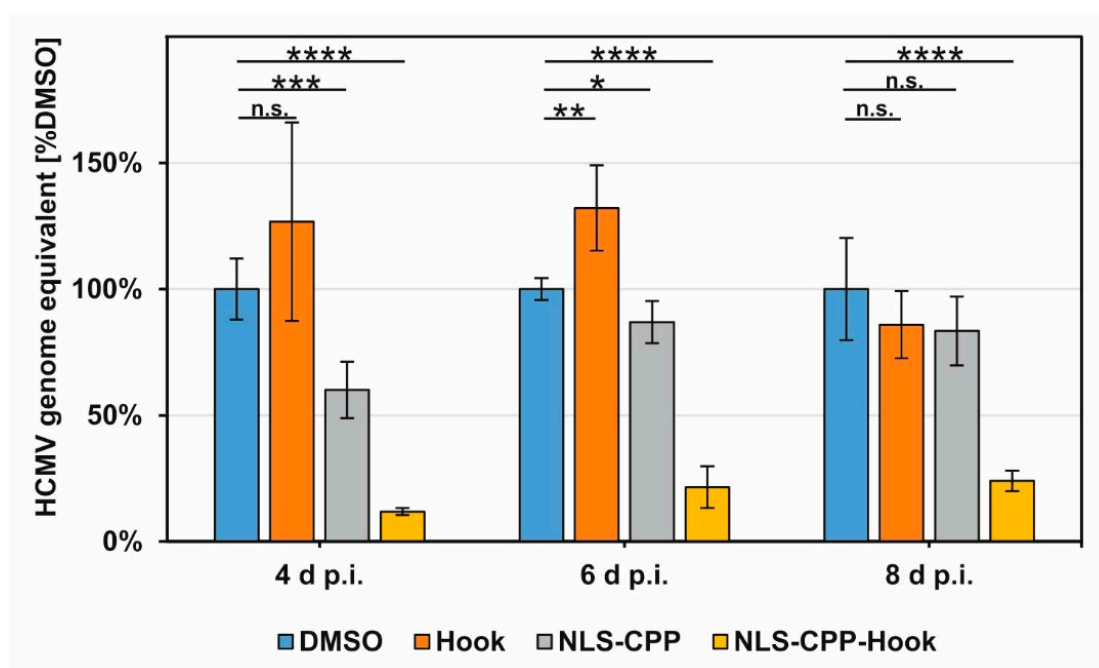

**Figure S1.** Anti-HCMV activity of NLS-CPP-Hook, measured by virus genome-specific qPCR assay. HFFs were seeded in 12-well plates, used for HCMV infection at a MOI of 0.1 and treated with 6  $\mu$ M peptide solution. The peptide contained in the culture media was refreshed at 2, 5 and 7 d p.i., and viral supernatants were collected for an assessment of the viral genomic load by quantitative polymerase chain reaction (qPCR) at 4, 6 and 8 d p.i., as a measure of HCMV production and release. HCMV genome equivalents referring to the peptide treatments were calculated as percentage of the DMSO sample. Student's t-test was applied to determine statistical significance (\*\*\*\*,  $p \leq 0.0001$ ; \*\*\*,  $p \leq 0.001$ ; \*\*,  $p \leq 0.01$ ; \*,  $p \leq 0.05$ ; n.s.,  $p > 0.05$ ).

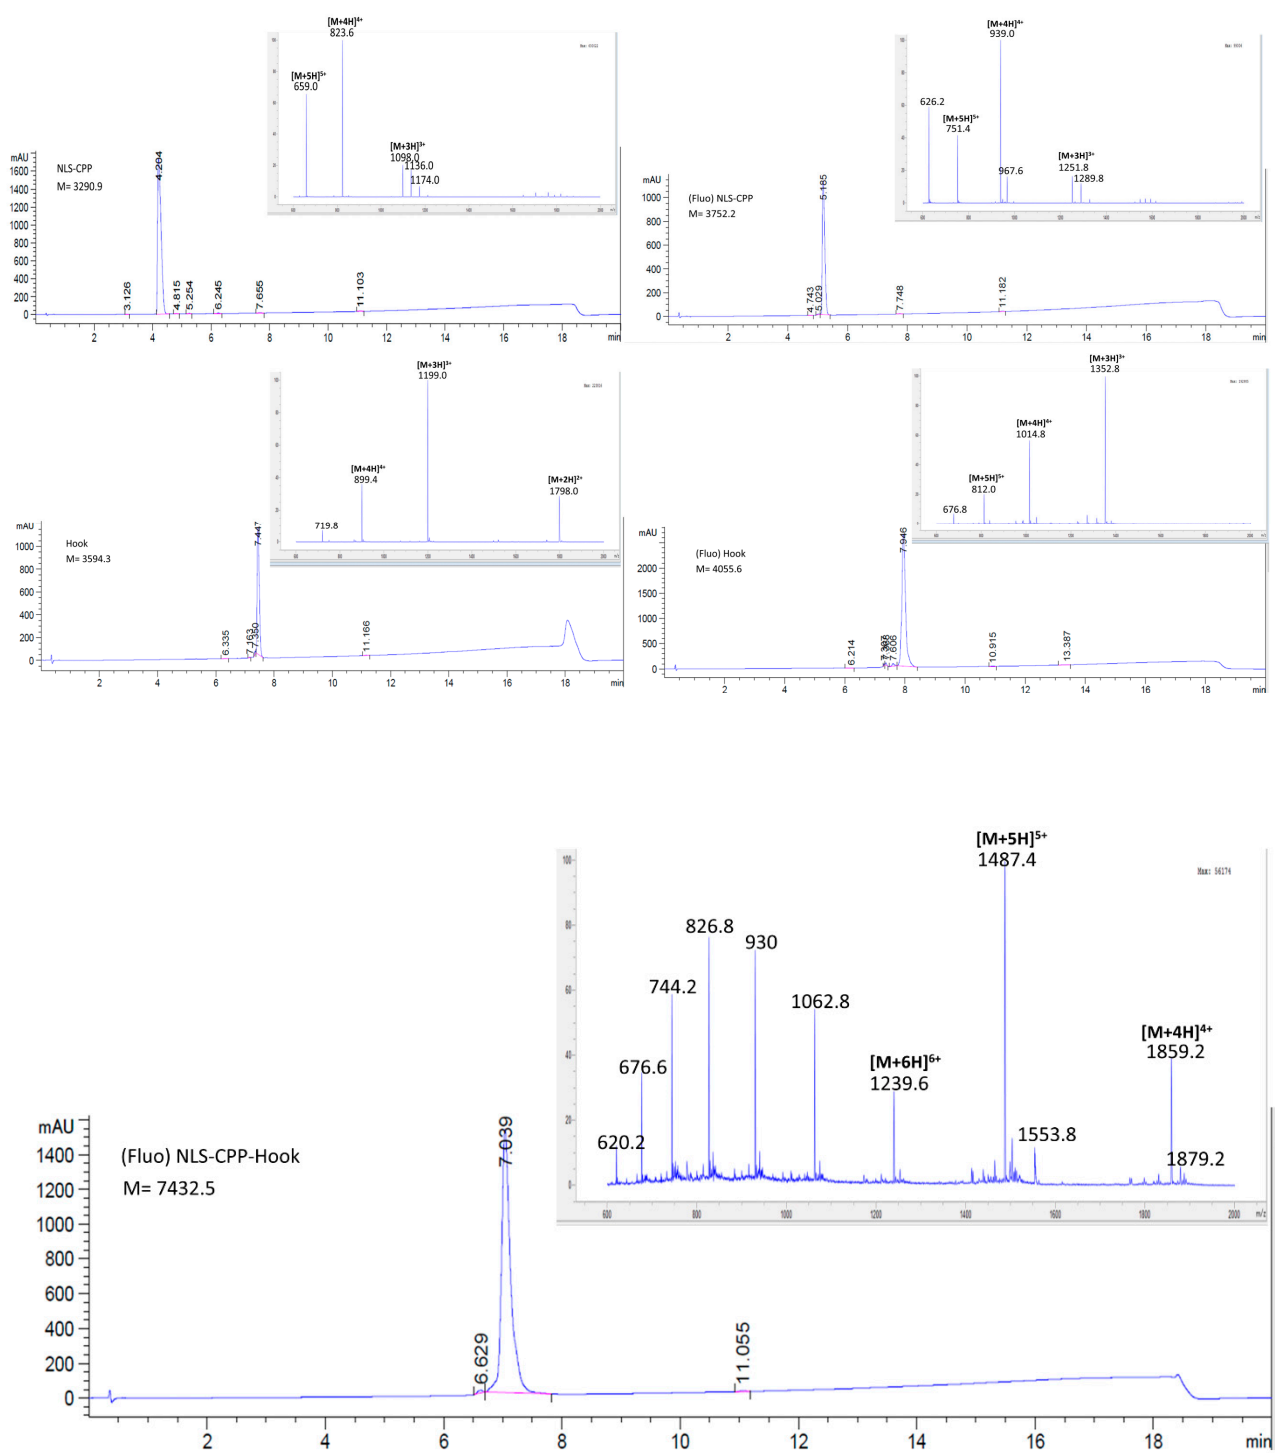

Figure S2. Analytical data (LC/MS) of synthesized peptides.
